# Supplementary material for: SARS-CoV-2 Infection of Human Ovarian Cells: A Potential Negative Impact on Female Fertility
Source: MDPI journal article supplement (doi:10.3390/cells11091431), 2022-04-23
Supplement: s1 [file s1]

### Supplementary Materials

**Table S1.** ID and sequences of primer used to detect gene expression.

| Target Genes                                    | Acronym | ID assay/primer sequence                                                                |
|-------------------------------------------------|---------|-----------------------------------------------------------------------------------------|
| Angiotensin-converting enzyme 2                 | ACE2    | Hs.PT.58.27645939                                                                       |
| Transmembrane serine protease 2                 | TMPRSS2 | Hs.PT.58.39408998                                                                       |
| Cathepsin L                                     | CTSL    | Hs.PT.58.45751460                                                                       |
| Basigin                                         | BSG     | Hs.PT.56a.39293590.g                                                                    |
| Spike                                           | SPIKE   | 5'GGCACGTAGTGTAGCTAGTC3'<br>5'TGGGTATGGCAATAGAGTTATTAG3<br>5'FAM-ACTATGTCACCTTGGT-MGB3' |
| Reference Genes                                 | Acronym | ID assay                                                                                |
| HypoxanthineGuanine PhosphoribosylTransferase 1 | HPRT1   | Hs.PT.58v.45621572                                                                      |
| Glyceraldehyde 3-phosphate dehydrogenase        | GAPDH   | Hs.PT.58.589810.g                                                                       |

**Table S2.** List of antibodies used in this study.

| Antigen                     | Donor species | Dilution |        | Manufacturer          | RRID       |
|-----------------------------|---------------|----------|--------|-----------------------|------------|
|                             |               | IF       | WB     |                       |            |
| <i>Primary antibodies</i>   |               |          |        |                       |            |
| $\beta$ -Actin              | Mouse         | -        | 1:3000 | Bio-Rad Laboratories  | AB_2223350 |
| ACE-2                       | Mouse         | 1:250    | 1:1000 | R&D System            | AB_355722  |
| TMPRSS2                     | Mouse         | 1:200    | 1:10   | Santa Cruz Technology | AB_2205599 |
| CTSL                        | Mouse         | 1:500    | 1:100  | Santa Cruz Technology | AB_626811  |
| BSG                         | Mouse         | 1:500    | 1:100  | Santa Cruz Technology | AB_626911  |
| SARS-CoV2 Nucleocapsid      | Mouse         | 1:1000   | 1:500  | Bio-techne            | AB_1522790 |
| SARS-CoV2 Spike             | Rabbit        | 1:1000   | 1:1000 | Bio-techne            | AB_1237374 |
| <i>Secondary antibodies</i> |               |          |        |                       |            |
| Anti-Mouse IgM FITC         | Goat          | 1:500    | -      | Sigma Life Science    | AB_259799  |
| Anti-Rabbit IgM FITC        | Goat          | 1:200    | -      | Sigma Life Science    | AB_1137637 |
| Anti-Mouse-IgG HRP          | Goat          | -        | 1:5000 | Bio-Rad Laboratories  | AB_609692  |
| Anti-Rabbit-IgG HRP         | Goat          | -        | 1:5000 | Bio-Rad Laboratories  | AB_1102634 |
